# Supplementary material
Source: publisher site journal article supplement (https://www.spandidos-publications.com/3682/downloadSupplementary)

Figure S1. ROS inhibitor NAC downregulates the expression levels of Nrf2, p65 and IKK proteins induced by PM<sub>2.5</sub> or PM<sub>2.5</sub> plus ISO. 16-HBE cells were cultured and treated with ROS inhibitor (5 mM) for 2 h. Subsequently, the cells were exposed to PM<sub>2.5</sub> (25 μg/ml) or PM<sub>2.5</sub> plus ISO (80 μg/ml) for 24 h. (A) The expression levels of Nrf2, p65 and IKK proteins were detected by western blot analysis. Statistical graphs of the expression of (B) Nrf2, (C) p65 and (D) IKK. Results are expressed as the mean ± SD, (n=6). P indicates PM<sub>2.5</sub>. NAC + P indicates NAC + PM<sub>2.5</sub>. NAC + P + I indicates NAC + PM<sub>2.5</sub> + ISO. \*P<0.05 compared with the NC group, NAC + P group or NAC + P + I group. ROS, reactive oxygen species; Nrf2, nuclear factor erythroid 2-related factor 2; IKK, IκB kinase; PM<sub>2.5</sub>, fine particulate matter ≤2.5 μm in diameter.

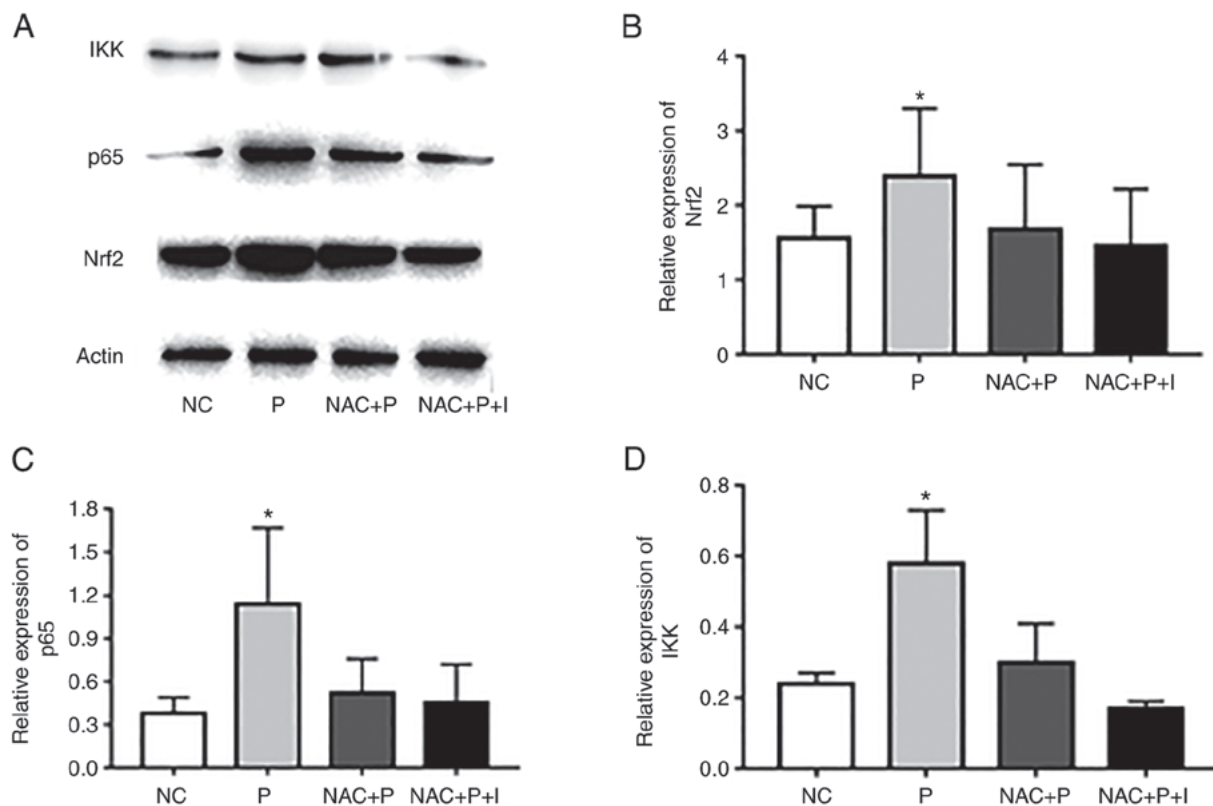

Supplement: Supplementary file 1 [file downloadSupplementary]
